# Supplementary material for: Transfer of Maternal Antibodies against Avian Influenza Virus in Mallards (Anas platyrhynchos)
Source: PLOS journal article supplement (doi:10.1371/journal.pone.0112595), 2014-11-11
Supplement: S2 (10.1371/journal.pone.0112595.s002) [file journal.pone.0112595.s002]

**Table S1. Correlation coefficients between the (continuous) covariates of interest for the field and captive study.** Covariates that are significantly correlated are depicted in bold.

| Covariate                                          | Field study <sup>1</sup> |         |                  |                | Captive study <sup>2</sup> |         |         |                |
|----------------------------------------------------|--------------------------|---------|------------------|----------------|----------------------------|---------|---------|----------------|
|                                                    | r                        | t-value | p-value          | r <sup>2</sup> | r                          | t-value | p-value | r <sup>2</sup> |
| Body mass * AIV OD-value female serum <sup>3</sup> | 0.38                     | 4.378   | <b>&lt;0.001</b> | 0.14           | 0.14                       | 0.794   | 0.433   | 0.05           |
| Body mass * Egg volume                             | 0.43                     | 5.115   | <b>&lt;0.001</b> | 0.16           | 0.26                       | 1.523   | 0.138   | 0.04           |
| Body mass * Egg laying order                       |                          |         |                  |                | 0.13                       | 0.689   | 0.496   | -0.02          |
| AIV OD-value female serum * Egg volume             | 0.07                     | 0.752   | 0.455            | 0.00           | -0.28                      | -1.651  | 0.109   | 0.05           |
| AIV OD-value female serum * Egg laying order       |                          |         |                  |                | 0.28                       | 1.647   | 0.110   | 0.05           |
| Egg volume * Egg laying order                      |                          |         |                  |                | -0.31                      | -1.797  | 0.082   | 0.07           |

<sup>1</sup>Free-living mallards and eggs

<sup>2</sup>Captive mallards and eggs

<sup>3</sup>Relative concentration of antibodies against avian influenza virus (AIV) in female sera
